# Supplementary figures and images for: Assessment of performance and safety of Corneal Chamber hypothermic storage medium and PSS-L corneal rinsing solution in human and porcine corneas
Source: HighWire-hosted journal article supplement (doi:10.1136/bmjophth-2023-001453), 2024-02-01

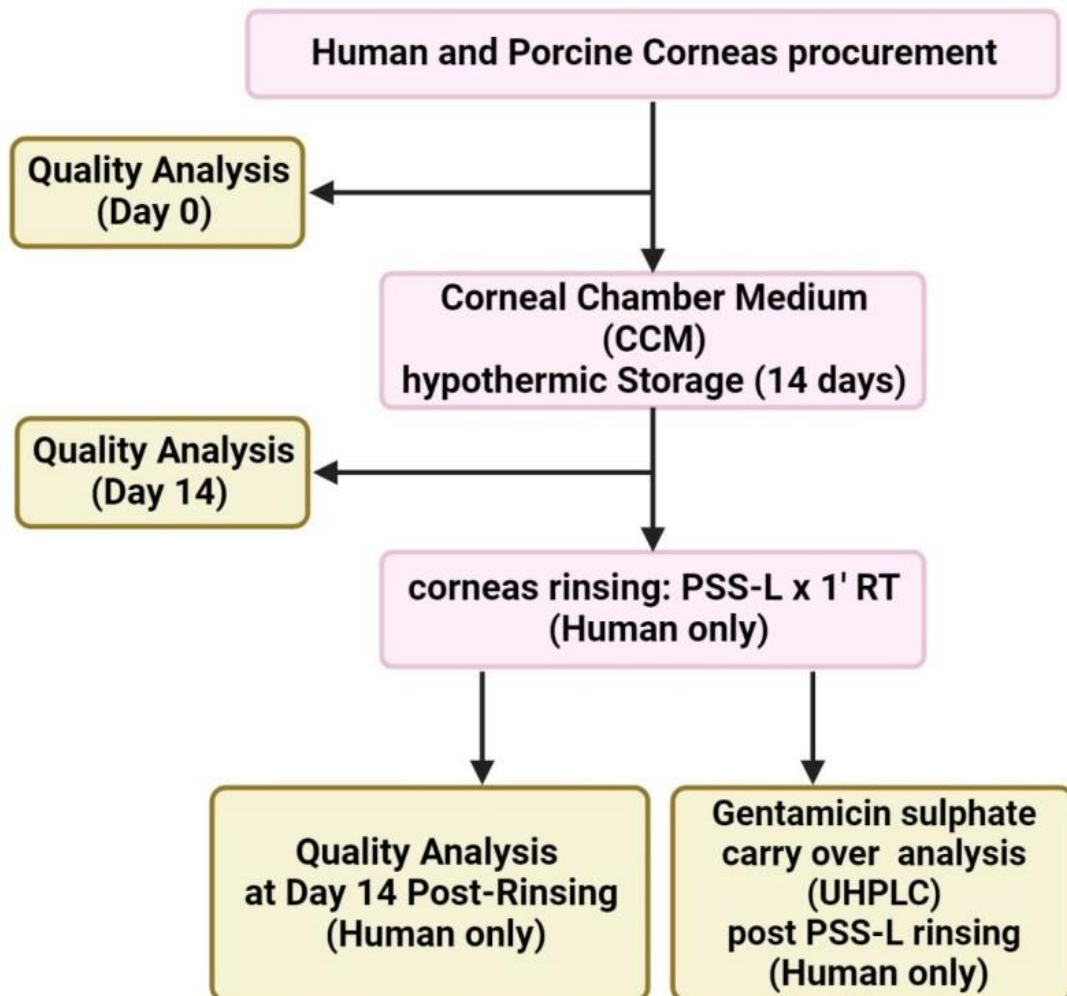

Supplement: bmjophth-2023-001453supp002_data_supplement.pdf [file bmjophth-2023-001453supp002_data_supplement.pdf]
